# Supplementary material for: Endoscopic submucosal dissection versus endoscopic mucosal resection for patients with early gastric cancer: a meta-analysis
Source: PubMed Central journal article supplement — BMJ Open. 2019 Dec 23;9(12):e025803. doi: 10.1136/bmjopen-2018-025803 (PMC7008428; doi:10.1136/bmjopen-2018-025803), 2019-12-23
Supplement: bmjopen-2018-025803supp001.pdf [file bmjopen-2018-025803supp001.pdf]

**Search strategy in PubMed:**

#1. "Stomach Neoplasms"[Mesh]

#2. Neoplasm, Stomach OR Stomach Neoplasm OR Neoplasms, Stomach OR Gastric Neoplasms OR Gastric Neoplasm OR Neoplasm, Gastric OR Neoplasms, Gastric OR Cancer of Stomach OR Stomach Cancers OR Gastric Cancer OR Cancer, Gastric OR Cancers, Gastric OR Gastric Cancers OR Stomach Cancer OR Cancer, Stomach OR Cancers, Stomach OR Cancer of the Stomach OR Gastric Cancer, Familial Diffuse

#3. #1 or #2

#4. "endoscopic submucosal dissection"[Title/Abstract]

#5. "endoscopic mucosal resection"[Title/Abstract]

#6. "human"

#7. And/#3 to #6

AND “endoscopic submucosal dissection” AND “endoscopic mucosal resection”
