# Supplementary material for: Endoscopic submucosal dissection versus endoscopic mucosal resection for patients with early gastric cancer: a meta-analysis
Source: PubMed Central journal article supplement — BMJ Open. 2019 Dec 23;9(12):e025803. doi: 10.1136/bmjopen-2018-025803 (PMC7008428; doi:10.1136/bmjopen-2018-025803), 2019-12-23
Supplement: bmjopen-2018-025803supp002.pdf [file bmjopen-2018-025803supp002.pdf]

Table S1. Quality scores of studies using Newcastle-Ottawa Scale.

| Study         | Selection                        |                          |                               |                                                               | Comparability                                        |                       | Outcome                     |                         | Overall score |
|---------------|----------------------------------|--------------------------|-------------------------------|---------------------------------------------------------------|------------------------------------------------------|-----------------------|-----------------------------|-------------------------|---------------|
|               | Representativeness of the cohort | Selection of the control | Ascertainment of intervention | Demonstration that outcomes was not present at start of study | Comparability on the basis of the design or analysis | Assessment of outcome | Adequate follow-up duration | Adequate follow-up rate |               |
| Hirasaki [28] | 0                                | 1                        | 1                             | 1                                                             | 1                                                    | 1                     | 1                           | 0                       | 6             |
| Hoteya [29]   | 0                                | 0                        | 1                             | 1                                                             | 1                                                    | 1                     | 0                           | 1                       | 5             |
| Oda [16]      | 1                                | 1                        | 1                             | 1                                                             | 1                                                    | 1                     | 1                           | 0                       | 7             |
| Min [30]      | 1                                | 0                        | 1                             | 1                                                             | 1                                                    | 1                     | 1                           | 0                       | 6             |
| Catalano [31] | 0                                | 1                        | 1                             | 1                                                             | 1                                                    | 1                     | 1                           | 0                       | 6             |
| Yokoi [32]    | 0                                | 0                        | 1                             | 1                                                             | 1                                                    | 1                     | 1                           | 0                       | 5             |
| Hoteya [33]   | 1                                | 0                        | 1                             | 1                                                             | 1                                                    | 1                     | 0                           | 1                       | 6             |
| Oka [17]      | 1                                | 0                        | 1                             | 1                                                             | 1                                                    | 1                     | 1                           | 0                       | 6             |
| Watanabe [34] | 1                                | 0                        | 0                             | 1                                                             | 1                                                    | 1                     | 1                           | 0                       | 5             |
| Shimura [35]  | 1                                | 1                        | 1                             | 1                                                             | 1                                                    | 1                     | 0                           | 1                       | 7             |
| Nakamoto [36] | 1                                | 0                        | 0                             | 1                                                             | 1                                                    | 1                     | 1                           | 1                       | 6             |

---

|                     |   |   |   |   |   |   |   |   |   |
|---------------------|---|---|---|---|---|---|---|---|---|
| Choi [37]           | 0 | 1 | 1 | 1 | 1 | 1 | 0 | 0 | 5 |
| Ahn [38]            | 1 | 1 | 1 | 1 | 1 | 1 | 1 | 0 | 7 |
| Kim [39]            | 0 | 1 | 1 | 1 | 1 | 1 | 0 | 0 | 5 |
| Oka [40]            | 1 | 0 | 1 | 1 | 1 | 1 | 1 | 0 | 6 |
| Pimentel-Nunes [41] | 1 | 0 | 1 | 1 | 1 | 1 | 1 | 0 | 6 |
| Tanabe [42]         | 1 | 0 | 1 | 1 | 1 | 1 | 1 | 0 | 6 |
| Watanabe [43]       | 1 | 0 | 1 | 1 | 1 | 1 | 0 | 0 | 5 |

---
